# Supplementary material
Source: PubMed Central journal article supplement (PMC6317875)
Supplement: NIHMS1506890-supplement-1.pdf [file NIHMS1506890-supplement-1.pdf]

**Figure S1**

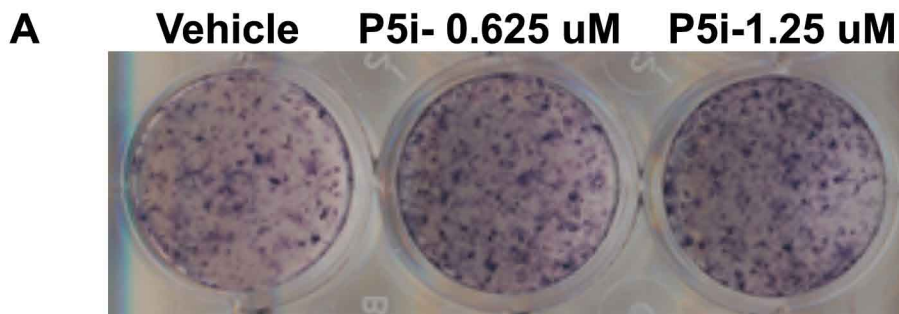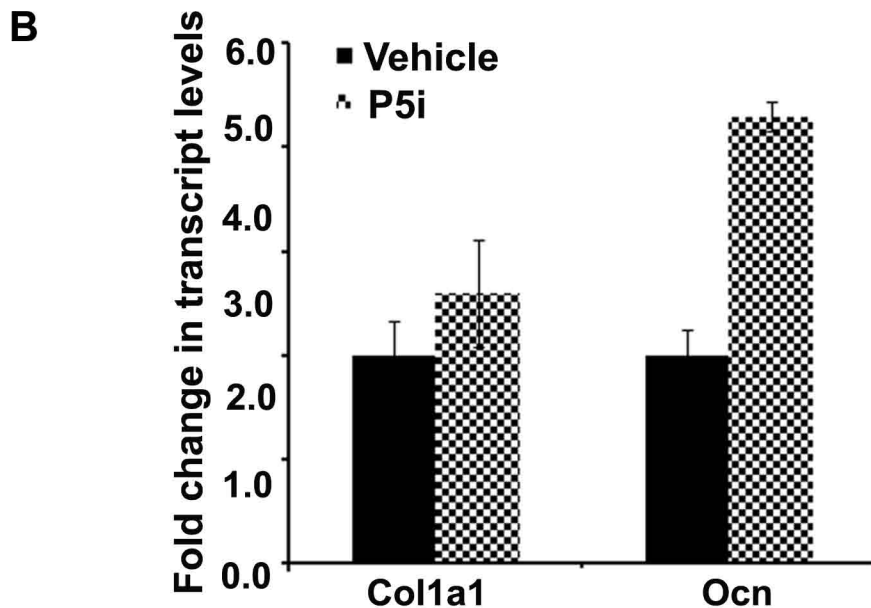

Figure S2

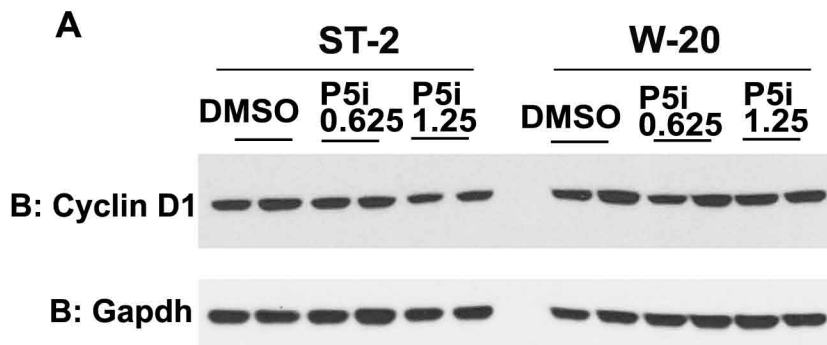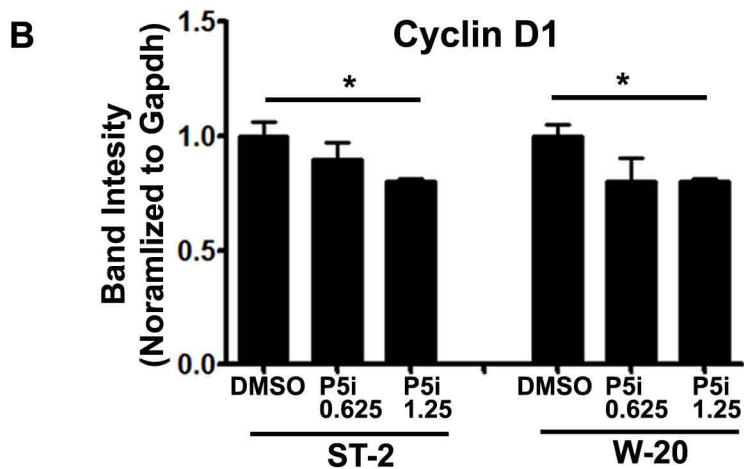

**Figure S3**

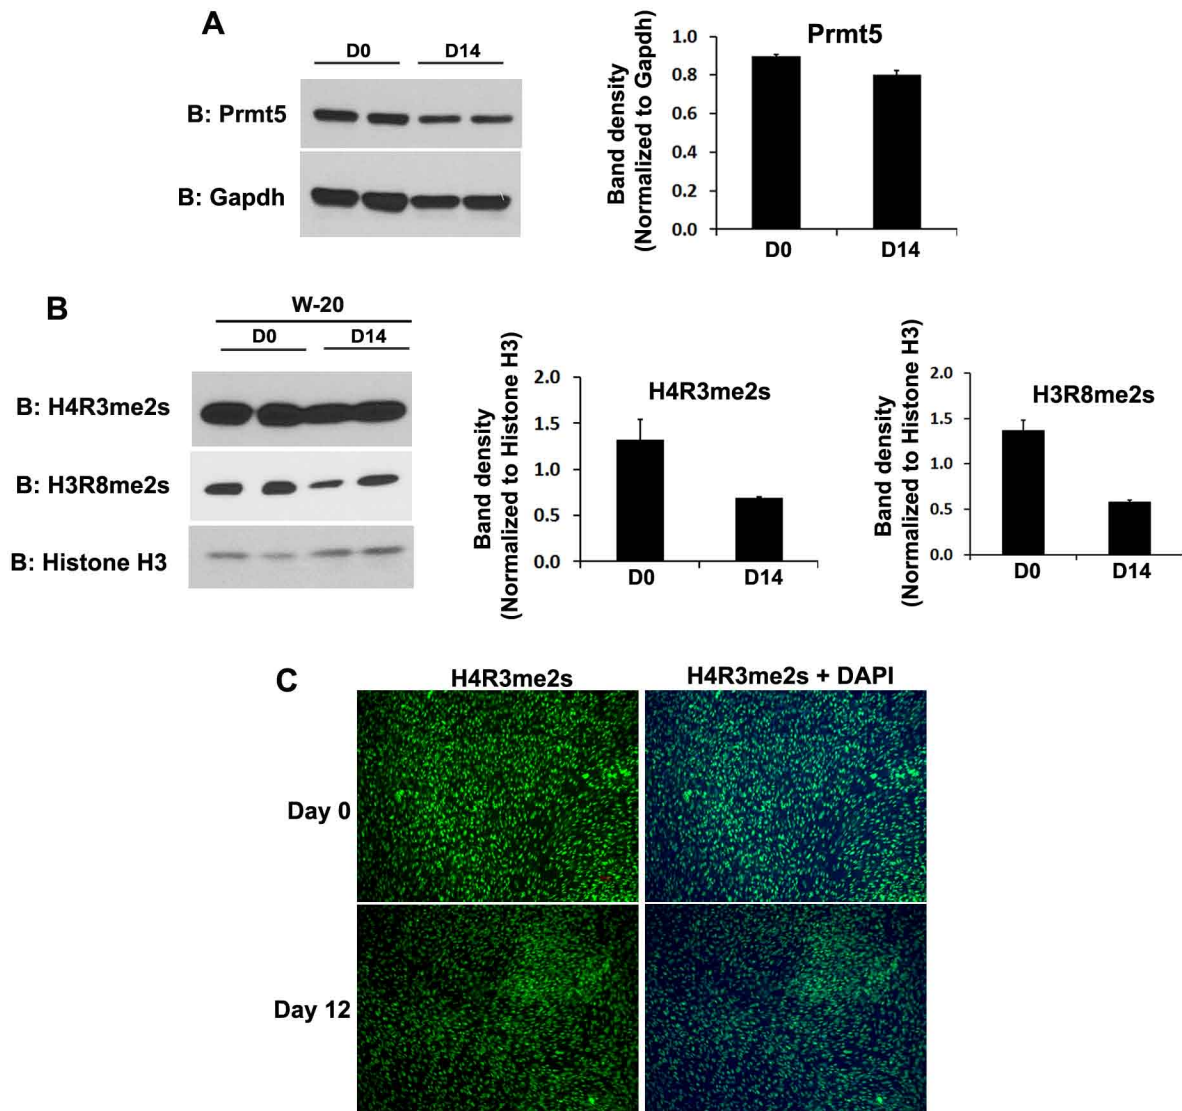

**Figure S4**

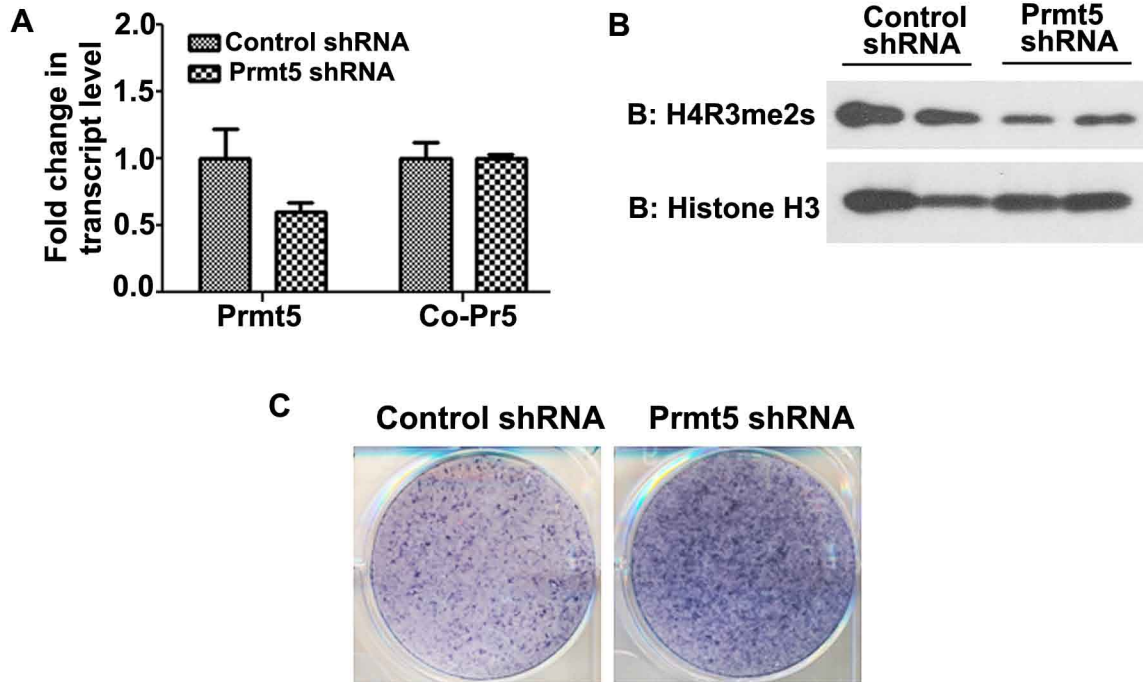

# Figure S5

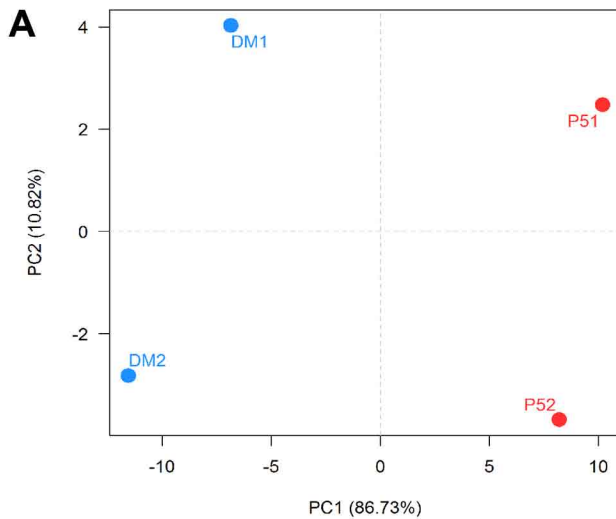

**B**

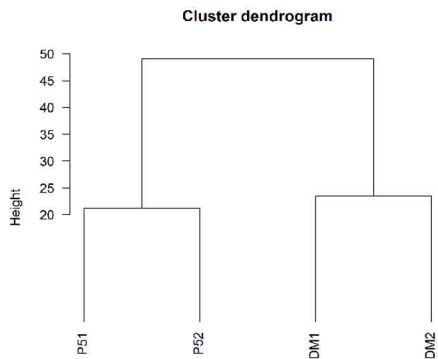

Method: Euclidean distance - Ward criterion  
hclust ("ward.D")

## Figure S6

PECAM1 interactions\_Homo sapiens\_R-HSA-210990

Molecules associated with elastic fibres\_Homo sapiens\_R-HSA-2129379

Elastic fibre formation\_Homo sapiens\_R-HSA-1566948

Extracellular matrix organization\_Homo sapiens\_R-HSA-1474244

Abacavir metabolism\_Homo sapiens\_R-HSA-2161541

Triglyceride Biosynthesis\_Homo sapiens\_R-HSA-75109

Muscle contraction\_Homo sapiens\_R-HSA-397014

Synthesis of 5-eicosatetraenoic acids\_Homo sapiens\_R-HSA-2142688

Synthesis of Lipoxins (LX)\_Homo sapiens\_R-HSA-2142700

Developmental Biology\_Homo sapiens\_R-HSA-1266738

Figure S7

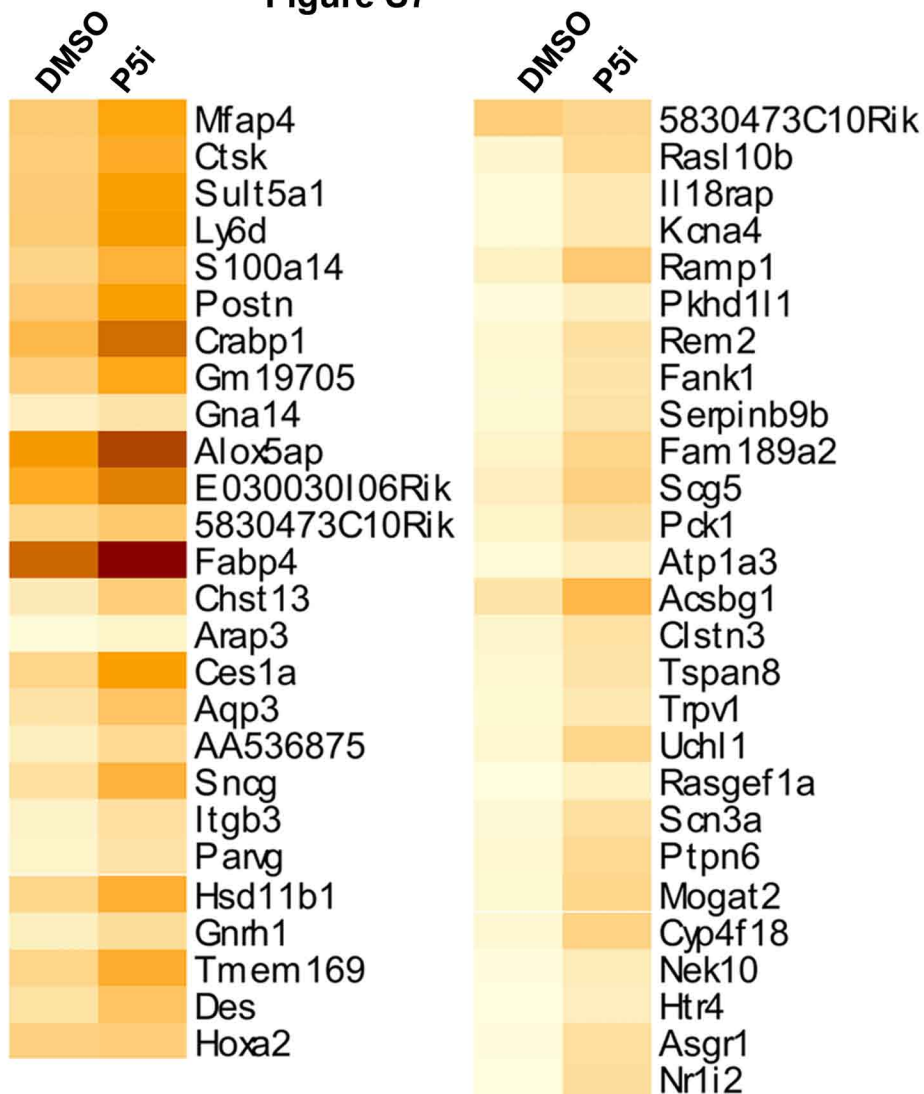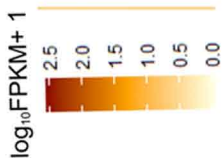

Figure S8

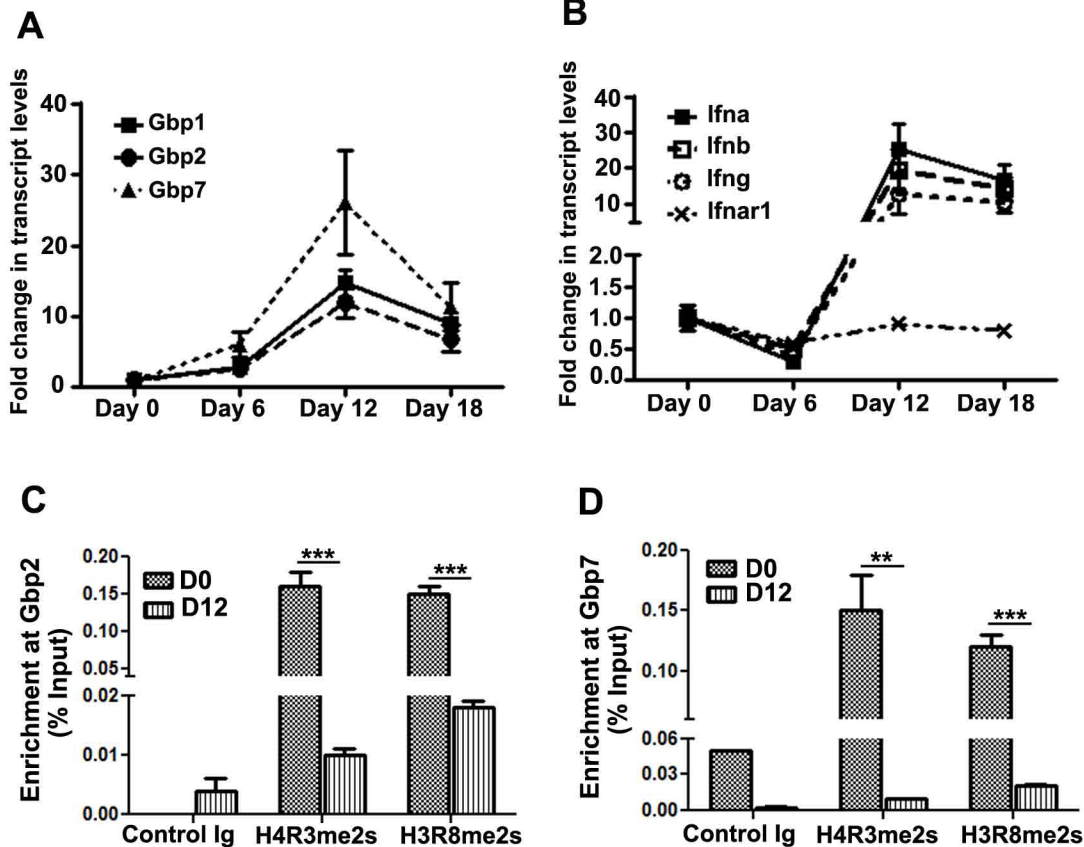



**Figure S9**

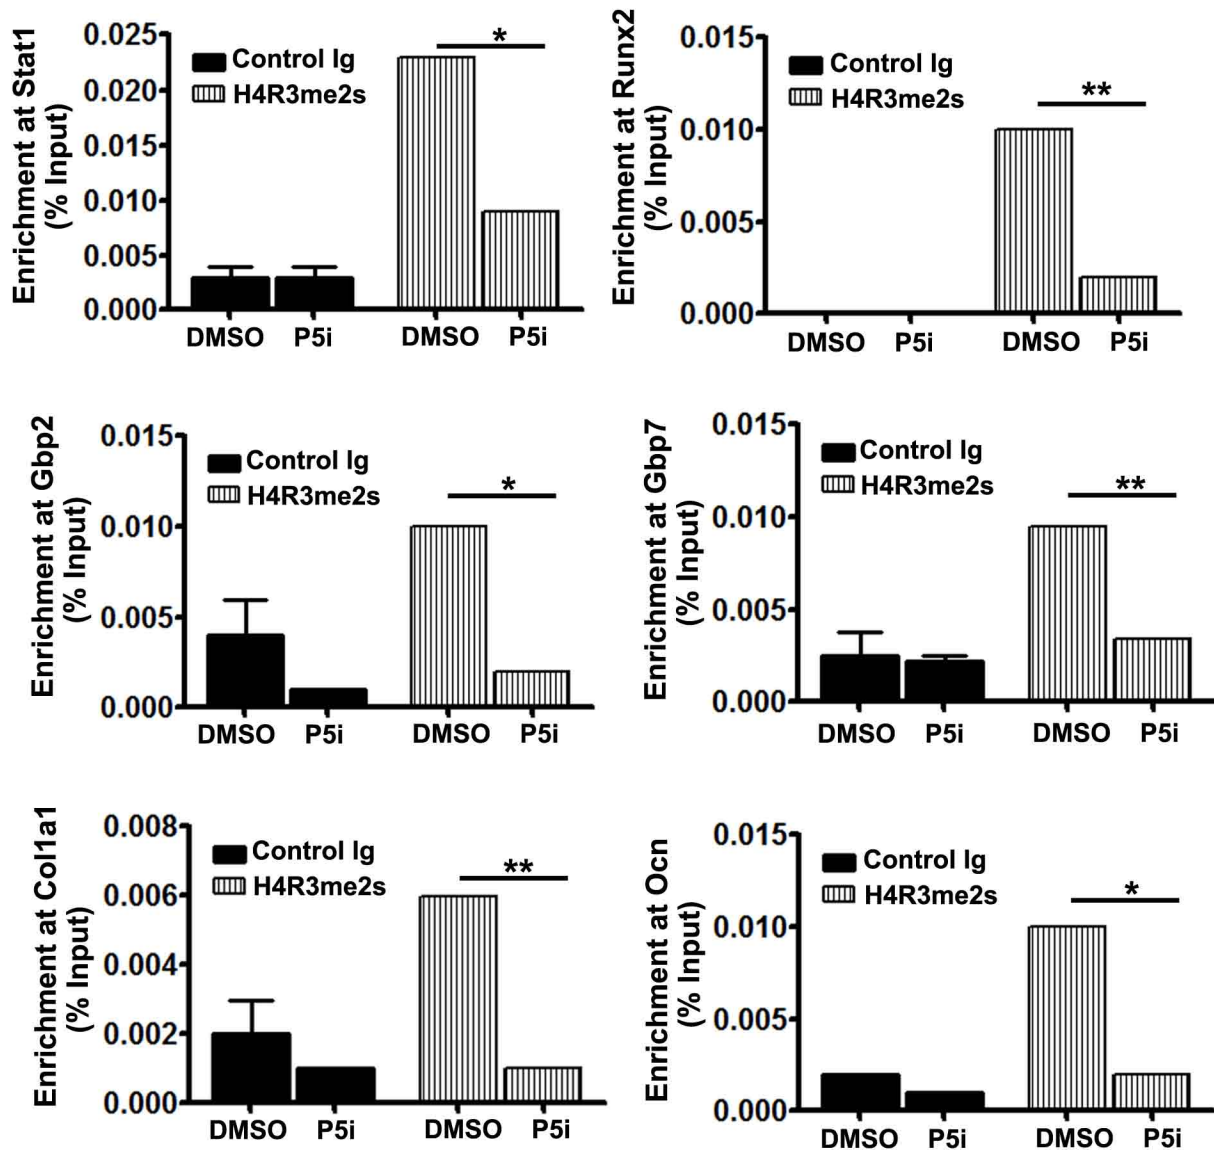

**Figure S10**

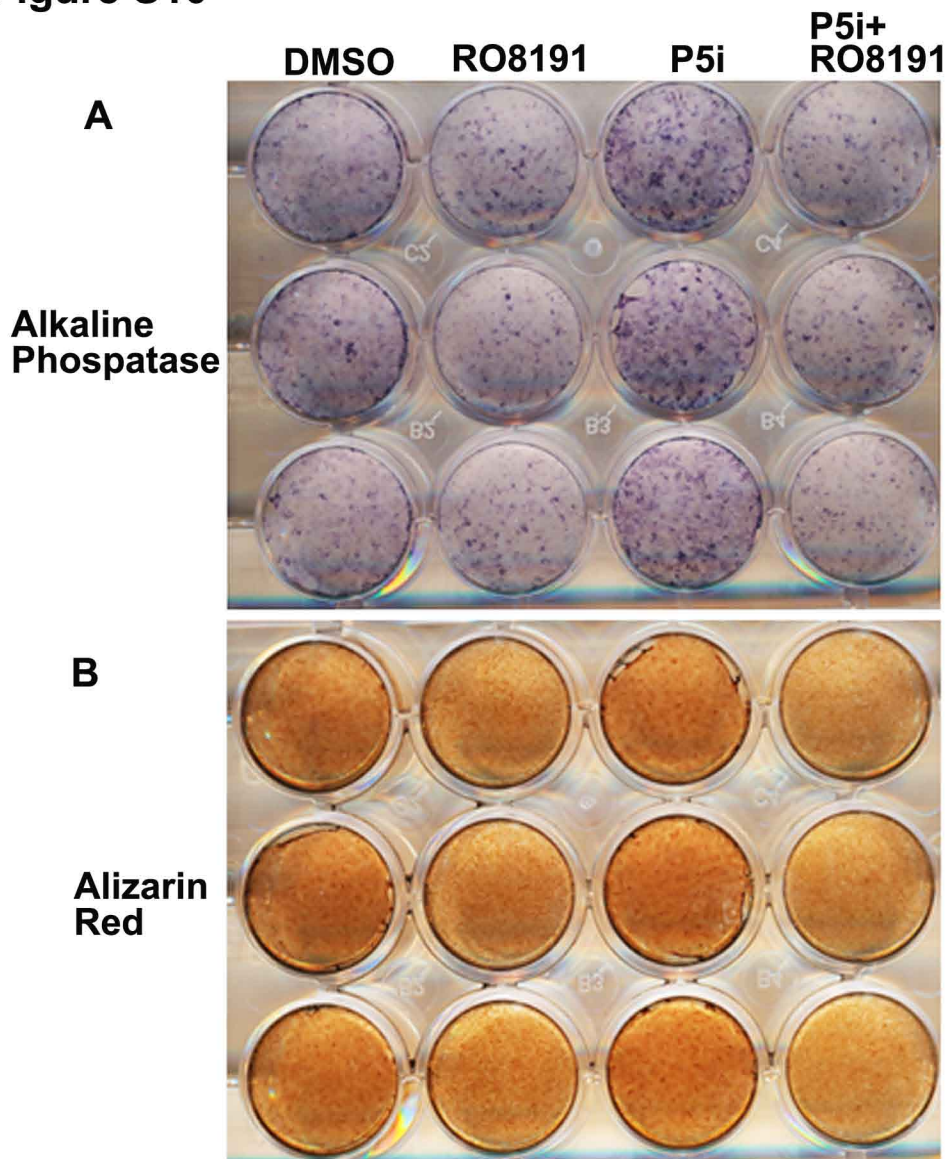

**Figure S11**

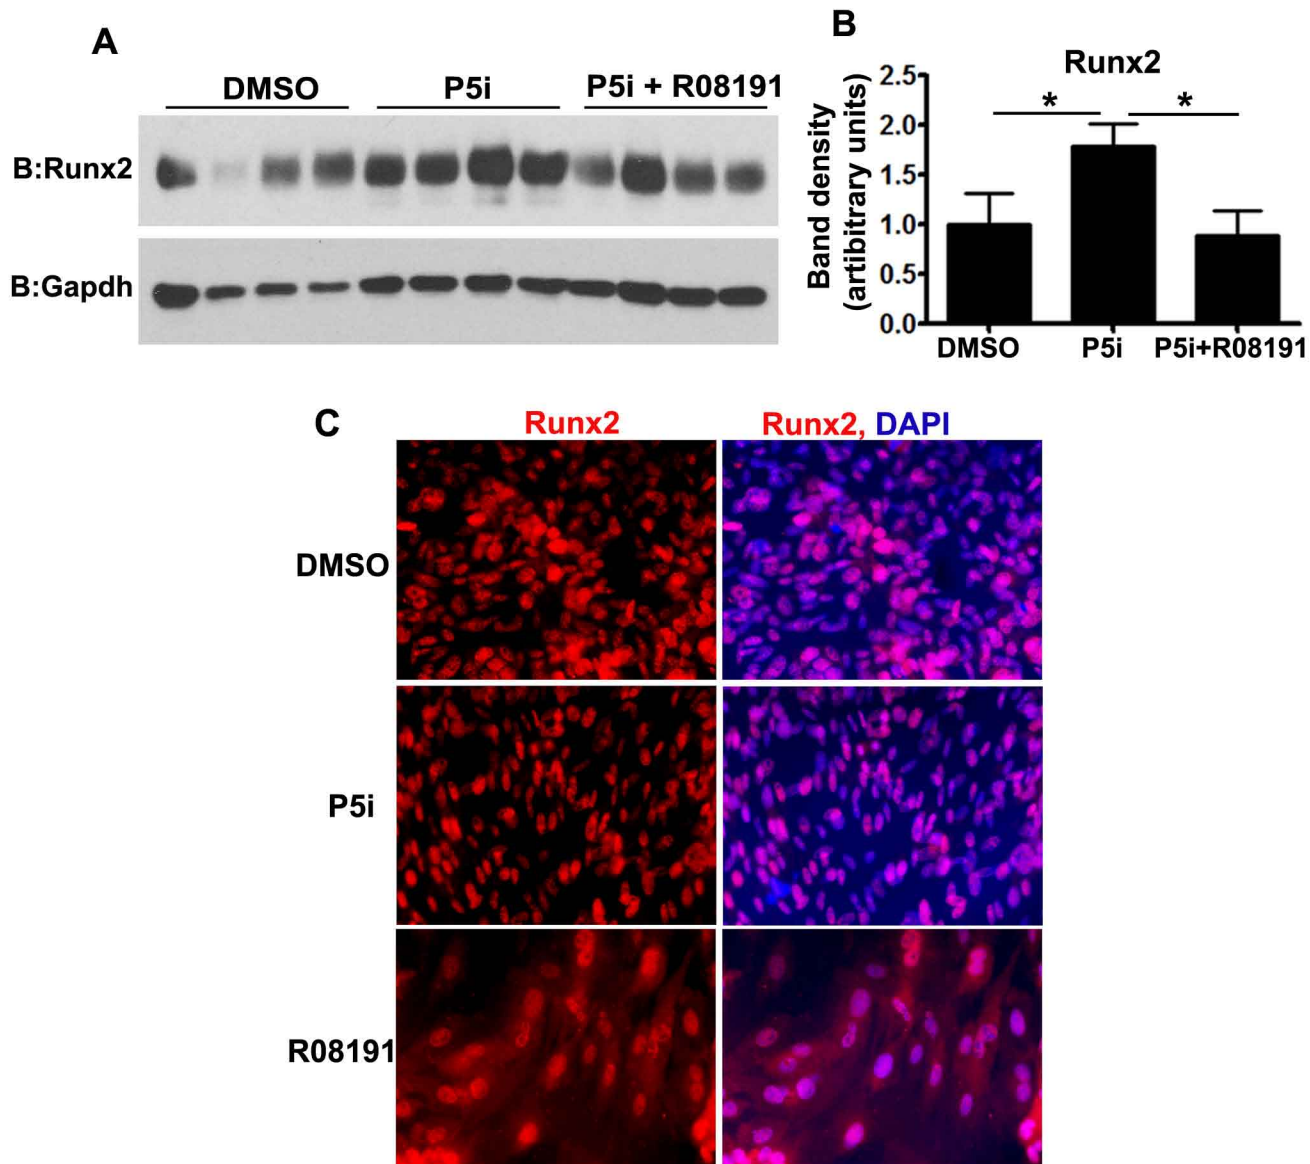

## Supplementary Table-1

| gene_id     | locus                     | log2(fold_change) | q_value    |
|-------------|---------------------------|-------------------|------------|
| XLOC_004934 | chr11:48865185-48872556   | -1.50041          | 0.00354515 |
| XLOC_010675 | chr15:84324719-84342978   | 1.50534           | 0.00354515 |
| XLOC_020415 | chr3:95499285-95509412    | 1.5063            | 0.00354515 |
| XLOC_023763 | chr4:156199423-156200818  | -1.50703          | 0.00354515 |
| XLOC_002744 | chr10:22113049-22149270   | 1.515             | 0.00354515 |
| XLOC_009407 | chr14:67745228-67749569   | 1.52804           | 0.0214093  |
| XLOC_023084 | chr4:41092723-41108859    | 1.54695           | 0.00354515 |
| XLOC_031787 | chr8:61921910-62038234    | -1.54852          | 0.00354515 |
| XLOC_015369 | chr18:37972622-37998969   | 1.5509            | 0.0291337  |
| XLOC_020639 | chr3:142594846-142638008  | -1.55192          | 0.00354515 |
| XLOC_028225 | chr6:41073529-41074798    | 1.55306           | 0.0306172  |
| XLOC_030129 | chr7:24978156-25005895    | 1.5561            | 0.0161319  |
| XLOC_027710 | chr6:90308350-90325185    | 1.55764           | 0.00652959 |
| XLOC_031584 | chr8:9140053-9153598      | 1.55811           | 0.00354515 |
| XLOC_000434 | chr1:136683377-136690806  | 1.55824           | 0.0266625  |
| XLOC_004139 | chr11:61485443-61494230   | 1.56832           | 0.0412234  |
| XLOC_004636 | chr11:104607999-104670471 | 1.57126           | 0.00354515 |
| XLOC_001427 | chr1:193207699-193264046  | 1.57131           | 0.00354515 |
| XLOC_026886 | chr6:52158403-52166355    | 1.57189           | 0.00354515 |
| XLOC_020352 | chr3:90526848-90528835    | 1.5789            | 0.00354515 |
| XLOC_020700 | chr3:10204342-10208576    | 1.57983           | 0.00354515 |
| XLOC_016813 | chr19:12002228-12002647   | -1.58143          | 0.00354515 |
| XLOC_013388 | chr17:35342332-35384674   | -1.58423          | 0.00354515 |
| XLOC_020196 | chr3:54361106-54391041    | 1.58439           | 0.00354515 |
| XLOC_004087 | chr11:58199555-58222783   | -1.5981           | 0.00354515 |
| XLOC_011700 | chr15:85663116-85664907   | -1.59815          | 0.00354515 |
| XLOC_009523 | chr14:123168502-123254035 | 1.6101            | 0.0278683  |
| XLOC_028306 | chr6:65150940-65151254    | 1.61217           | 0.0115819  |
| XLOC_035181 | chr9:41610229-41611677    | -1.61857          | 0.0178458  |
| XLOC_013993 | chr17:35994503-36038174   | -1.61896          | 0.00354515 |
| XLOC_000217 | chr1:75360343-75367970    | 1.62319           | 0.00354515 |
| XLOC_034549 | chr9:48537708-48539257    | -1.62567          | 0.00354515 |
| XLOC_005508 | chr11:100690712-100704455 | -1.62648          | 0.00354515 |
| XLOC_014676 | chr17:44593390-44595400   | -1.64398          | 0.0318953  |
| XLOC_006439 | chr12:26469214-26479837   | -1.64583          | 0.00354515 |
| XLOC_000187 | chr1:72284372-72303091    | 1.65824           | 0.00354515 |
| XLOC_032756 | chr8:123141652-123158414  | 1.67887           | 0.00354515 |
| XLOC_006580 | chr12:78224728-78684769   | -1.68645          | 0.00354515 |
| XLOC_011002 | chr15:74762055-74763567   | 1.68963           | 0.00354515 |
| XLOC_013932 | chr17:33996011-34000421   | -1.69319          | 0.00354515 |
| XLOC_025177 | chr5:149264703-149288142  | 1.69629           | 0.00354515 |
| XLOC_004936 | chr11:48903580-49135387   | -1.6964           | 0.00354515 |
| XLOC_007797 | chr13:32450366-32453157   | 1.70673           | 0.00354515 |
| XLOC_006223 | chr11:98056525-98057909   | 1.71393           | 0.00354515 |

|             |                           |          |            |
|-------------|---------------------------|----------|------------|
| XLOC_012464 | chr16:35832877-35871539   | -1.7196  | 0.00354515 |
| XLOC_024941 | chr5:120812631-120824773  | -1.72221 | 0.00354515 |
| XLOC_018062 | chr2:173153072-173159253  | 1.73901  | 0.00354515 |
| XLOC_027840 | chr6:124430755-124464784  | 1.74274  | 0.00354515 |
| XLOC_029531 | chr7:104244456-104262236  | -1.74872 | 0.00354515 |
| XLOC_032983 | chr8:44934522-44935141    | 1.75899  | 0.00354515 |
| XLOC_004441 | chr11:88066398-88068183   | 1.76027  | 0.00354515 |
| XLOC_025627 | chr5:114896833-114912245  | -1.77493 | 0.0178458  |
| XLOC_018412 | chr2:65457117-65567541    | 1.78853  | 0.00354515 |
| XLOC_002562 | chr10:115817283-115849893 | 1.80115  | 0.0291337  |
| XLOC_013390 | chr17:35424876-35428361   | -1.81219 | 0.00354515 |
| XLOC_020438 | chr3:96497777-96498179    | -1.82455 | 0.00354515 |
| XLOC_014612 | chr17:36215586-36215649   | -1.8504  | 0.00354515 |
| XLOC_024741 | chr5:90518948-90598209    | 1.85875  | 0.0090981  |
| XLOC_025666 | chr5:120876141-120907525  | -1.90894 | 0.00354515 |
| XLOC_010487 | chr15:44457552-44597135   | 1.91615  | 0.00354515 |
| XLOC_003760 | chr10:115269945-115270317 | -1.92324 | 0.00354515 |
| XLOC_005338 | chr11:88063166-88066135   | 1.93513  | 0.00354515 |
| XLOC_033862 | chr9:54764807-54773109    | 1.94478  | 0.00354515 |
| XLOC_018745 | chr2:113776312-113829091  | 1.95872  | 0.0139716  |
| XLOC_007801 | chr13:33027413-33040558   | 1.97117  | 0.0196514  |
| XLOC_021287 | chr3:151730843-151749959  | -1.99198 | 0.00354515 |
| XLOC_019136 | chr2:173206611-173218922  | -2.01213 | 0.00354515 |
| XLOC_013385 | chr17:35263093-35267497   | -2.02333 | 0.00354515 |
| XLOC_012249 | chr16:97535329-97561195   | -2.03498 | 0.00354515 |
| XLOC_017607 | chr2:107290588-107298504  | 2.07354  | 0.00354515 |
| XLOC_027144 | chr6:118066384-118091546  | 2.09008  | 0.0306172  |
| XLOC_016151 | chr19:34640888-34651845   | -2.09203 | 0.00354515 |
| XLOC_000093 | chr1:40515361-40549529    | 2.1094   | 0.00652959 |
| XLOC_004253 | chr11:72301628-72313813   | -2.1107  | 0.00354515 |
| XLOC_012031 | chr16:23601529-23614297   | -2.11852 | 0.00354515 |
| XLOC_016532 | chr19:23972672-24031019   | 2.12874  | 0.00354515 |
| XLOC_026518 | chr5:125408781-125409095  | -2.13392 | 0.0090981  |
| XLOC_029761 | chr7:133776890-133881532  | 2.13633  | 0.0139716  |
| XLOC_009307 | chr14:54476099-54480434   | 2.13908  | 0.0231011  |
| XLOC_009643 | chr14:34370273-34374670   | 2.16334  | 0.00354515 |
| XLOC_032575 | chr8:93020214-93048382    | 2.17724  | 0.00354515 |
| XLOC_034592 | chr9:54604996-54661885    | 2.18205  | 0.00354515 |
| XLOC_024899 | chr5:114896833-114912245  | -2.19171 | 0.00354515 |
| XLOC_022173 | chr3:144624501-144626202  | -2.19459 | 0.00354515 |
| XLOC_019361 | chr2:36219180-36220412    | 2.20454  | 0.0365657  |
| XLOC_036958 | chrY:90739145-90739258    | 2.21354  | 0.0278683  |
| XLOC_015132 | chr18:60439244-60443858   | -2.26006 | 0.00354515 |
| XLOC_025663 | chr5:120753097-120777659  | -2.26103 | 0.0090981  |
| XLOC_000286 | chr1:91179821-91225196    | 2.38091  | 0.00354515 |
| XLOC_026109 | chr5:38563201-38563830    | -2.3827  | 0.0487371  |
| XLOC_004393 | chr11:83410071-83421038   | 2.39092  | 0.00354515 |

|             |                          |          |            |
|-------------|--------------------------|----------|------------|
| XLOC_009129 | chr14:14820814-15006693  | 2.39419  | 0.0214093  |
| XLOC_027845 | chr6:124720717-124738709 | 2.39821  | 0.00354515 |
| XLOC_020637 | chr3:142530337-142550083 | -2.4064  | 0.00354515 |
| XLOC_016083 | chr19:16435666-16611353  | 2.46176  | 0.00354515 |
| XLOC_004267 | chr11:73232767-73260507  | 2.46378  | 0.00354515 |
| XLOC_024663 | chr5:66676120-66687234   | 2.52507  | 0.0291337  |
| XLOC_034180 | chr9:108953744-108984875 | 2.54276  | 0.00652959 |
| XLOC_019360 | chr2:36217144-36218504   | 2.54534  | 0.0178458  |
| XLOC_020638 | chr3:142560051-142573212 | -2.78903 | 0.00354515 |
| XLOC_032499 | chr8:71988481-72009626   | 2.80618  | 0.00354515 |
| XLOC_015157 | chr18:62324203-62467802  | 2.81133  | 0.00354515 |
| XLOC_026605 | chr5:147408853-147409579 | 2.8149   | 0.00354515 |
| XLOC_030571 | chr7:99219083-99238611   | 2.85136  | 0.00652959 |
| XLOC_004223 | chr11:70054368-70057894  | 2.98046  | 0.0306172  |
| XLOC_025662 | chr5:120730295-120749848 | -3.35716 | 0.00354515 |
| XLOC_012500 | chr16:38248327-38294873  | 3.47898  | 0.00354515 |

**Supplementary table 2**

| <b>Gene</b>    | <b>ChIP-PCR</b> | <b>Sequence</b>                               |
|----------------|-----------------|-----------------------------------------------|
| <i>Gbp7</i>    | Forward         | 5'-CGA CTT GTT TTC ATC CGC CG-3'              |
|                | Reverse         | 5'-ACC GGA TAT TGC CTG CAC TT-3'              |
| <i>Gbp2</i>    | Forward         | 5'-AGT GCC TGT GAG AGA GGA CA-3'              |
|                | Reverse         | 5'-TCT GTG CTG GTT TCA GCC TC-3'              |
| <b>qRT-PCR</b> |                 |                                               |
| <i>Oas3</i>    | Forward         | 5'-CCT CCC TTG GCA ATC CTT A-3'               |
|                | Reverse         | 5'-CTG AGT TCA CAG CAG CCG TA-3'              |
| <i>Adar</i>    | Forward         | 5'-CTT GCC CTG TTT CTT GCT GT-3'              |
|                | Reverse         | 5'-ATG GCT TTG CTG CTG AGT TC-3'              |
| <i>Gbp2</i>    | Forward         | 5'-CCA CTC TGG TCA GGT GAT GA-3'              |
|                | Reverse         | 5'-GAT CTT TGC TTT GGC AGT CC-3'              |
| <i>Nat1</i>    | Forward         | 5'-ATT CTT CGT TGT CAA GCC GCC AAA GTG GAG-3' |
|                | Reverse         | 5'-AGT TGT TTG CTG CGG AGT TGT CAT CTC GTC-3' |
| <i>Gbp7</i>    | Forward         | 5'-TTG CTT TGG AGT TCA CCC TC-3'              |
|                | Reverse         | 5'-TCC AGG TAG CAG AGA ATC CG-3'              |
| <i>Gbp1</i>    | Forward         | 5'-AGA TGC CCT TGG TGT GAG AC-3'              |
|                | Reverse         | 5'-CTC TAC CGC ACA GGC AAA TC-3'              |
| <i>Prmt5</i>   | Forward         | 5'-CTG AAT TGC GTC CCC GAA ATA-3'             |
|                | Reverse         | 5'-AGG TTC CTG AAT GAA CTC CCT-3'             |
| <i>Prmt7</i>   | Forward         | 5'-GCC AGG TCA TCC TAT GCC G-3'               |
|                | Reverse         | 5'-GCC AAT GTC AAG AAC CAA GGC-3'             |
| <i>Co-Pr5</i>  | Forward         | 5'-GCT CTG AGC TCC ACT GGC T-3'               |
|                | Reverse         | 5'-GAG CGG AGT TCG CAG GAG-3'                 |
| <i>Col1a1</i>  | Forward         | CCT GGA ATG AAG GGA CAC CG                    |
|                | Reverse         | CCA TCG TTA CCG CGA GCA CC                    |
| <i>Runx2</i>   | Forward         | GAG AGG TAC CAG ATG GGA CT                    |
|                | Reverse         | CAC TTG GGG AGG ATT TGT GA                    |
| <i>Osx</i>     | Forward         | AGG CAC AAA GAA GCC ATA C                     |
|                | Reverse         | AAT GAG TGA GGG AAG GGT                       |
| <i>Ocn</i>     | Forward         | CGC TCT GTC TCT CTG ACC TC                    |
|                | Reverse         | GAC TGA GGC TCC AAG GTA GC                    |

---
